# Supplementary material for: MicroRNA-34a targets epithelial to mesenchymal transition-inducing transcription factors (EMT-TFs) and inhibits breast cancer cell migration and invasion
Source: PubMed Central journal article supplement (PMC5400590; doi:10.18632/oncotarget.15214), 2017-02-09
Supplement: oncotarget-08-21362-s001.pdf [file oncotarget-08-21362-s001.pdf]

# MicroRNA-34a targets epithelial to mesenchymal transition-inducing transcription factors (EMT-TFs) and inhibits breast cancer cell migration and invasion

## SUPPLEMENTARY FIGURES AND TABLES

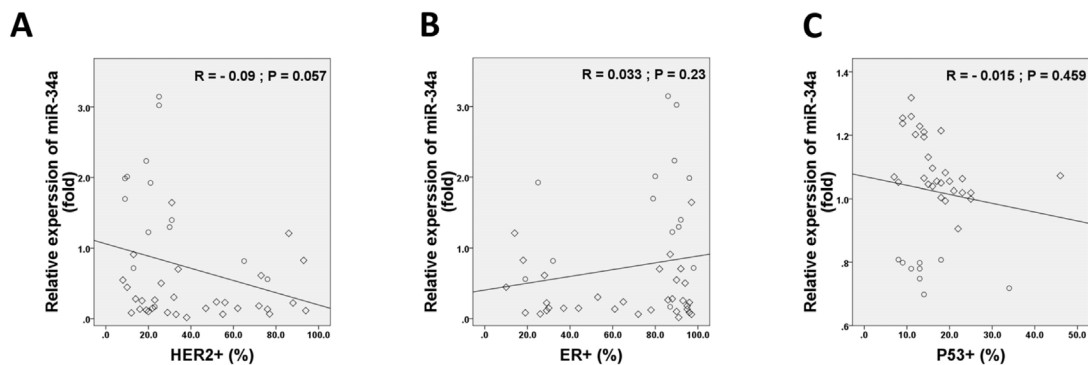

Supplementary Figure 1: Expression of HER2 A., ER B. and P53 C. Data were analyzed by Spearman's rank correlation coefficient.

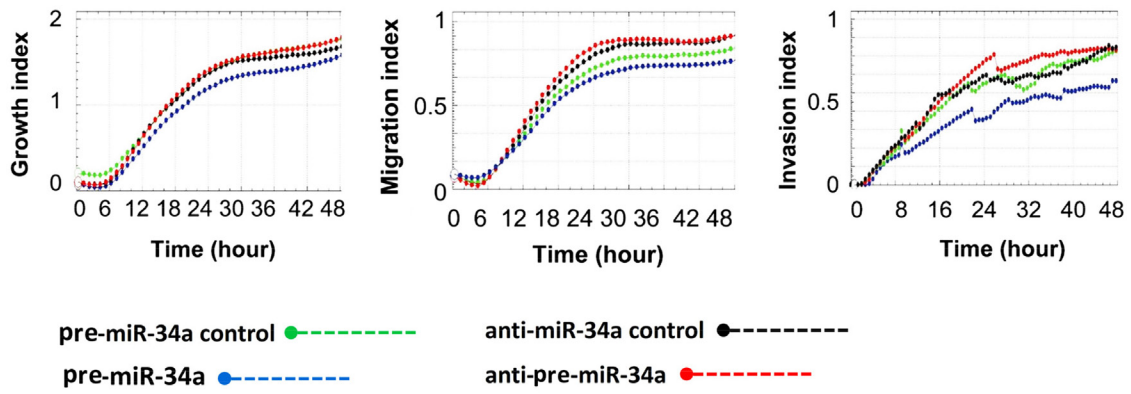

Supplementary Figure 2: Cell growth (left panel), cell migration (middle panel) and cell invasion (right panel) in MDA-MB-435 cells.

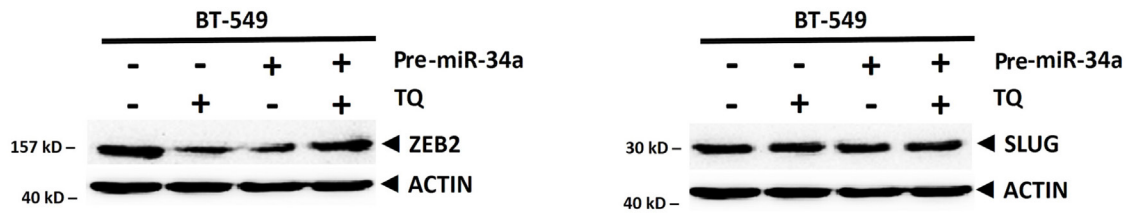

**Supplementary Figure 3: Synergistic effects of thymoquinone (TQ) and miR-34a on protein level expression of ZEB2 (left panel) and SLUG (right panel) by Western blot.** TQ (5  $\mu$ M) treatment for 12h and pre-miRNAs (20 ng of each) treatment for 36 h in the BT-549 cell line.  $\beta$ -actin (ACTIN) as an internal control .

Supplementary Table 1: Demographic and baseline clinic-philological characteristics of the patients

| Measure                          | ER +         | ER -         | P value      |
|----------------------------------|--------------|--------------|--------------|
| <i>Demographic variables</i>     |              |              |              |
| Subjects n (%)                   | 30 (62.5)    | 18 (37.5)    | <b>0.002</b> |
| Age (yrs.)                       | 46.34 ± 1.62 | 47.41 ± 2.69 | 0.21         |
| <i>Histopathologic variables</i> |              |              |              |
| Tumor histology n (%)            |              |              |              |
| Ductal                           | 16 (48.5%)   | 14 (42.4%)   | 0.197        |
| Lobular                          | 1 (3.0%)     | 2 (6.1%)     |              |
| Tumor Size                       |              |              |              |
| ≤ 3 cm                           | 3 (17.6%)    | 1 (6.2%)     | 0.36         |
| 3-6 cm                           | 7 (41.2%)    | 8 (50%)      |              |
| 6-9 cm                           | 4 (23.5%)    | 5 (31.2%)    |              |
| ≥ 9 cm                           | 3 (17.6%)    | 2 (12.5%)    |              |
| Diagnosis stage (TNM)            |              |              |              |
| Stage II                         | 10 (30.3%)   | 5 (15.2%)    | 0.272        |
| ≥ Stage III                      | 7 (21.2%)    | 11 (33.3%)   |              |
| Node status n (%)                |              |              |              |
| Negative                         | 14 (40.0%)   | 12 (34.3%)   | 0.864        |
| Positive                         | 5 (14.3%)    | 4 (11.4%)    |              |
| Neoadjuvant therapy n (%)        |              |              |              |
| Yes                              | 6 (18.8%)    | 6 (18.8%)    | 0.319        |
| No                               | 12 (37.5%)   | 8 (25.0%)    |              |
| Chemotherapy n (%)               |              |              |              |
| Yes                              | 6 (18.8%)    | 8 (25.0%)    | 0.339        |
| No                               | 12 (37.5%)   | 6 (18.8%)    |              |
| PR n (%)                         |              |              |              |
| Negative                         | 4 (8.3%)     | 18 (37.5%)   | <b>0.001</b> |
| Positive                         | 26 (54.2%)   | 0 (0%)       |              |
| P53 n (%)                        |              |              |              |
| Negative                         | 26 (65.0%)   | 8(20.0%)     | <b>0.001</b> |
| Positive                         | 1 (2.5%)     | 5 (12.5%)    |              |
| Ki67 n (%)                       |              |              |              |
| ≤ 30                             | 20 (41.7%)   | 7 (14.6%)    | 0.47         |
| > 30                             | 10 (20.8%)   | 11 (22.9%)   |              |
| Her2/neu n (%)                   |              |              |              |
| low/weak                         | 20 (41.7%)   | 7 (14.6%)    | 0.475        |
| moderate/strong                  | 10 (20.8%)   | 11 (22.9%)   |              |

Abbreviations: ER, estrogens receptor; TNM, TNM classification of malignant tumours; PR, progesterone receptor; HER2, human epidermal growth factor receptor-2.

Data are presented as an number (% percent of total samples) for all others.

Supplementary Table 2: List of specific primers sequences for RT-QPCR of candidate variants

| Target gene (probe No.) | Accession No.* | Sequence (5'→3')             | Length | T <sub>m</sub> | GC%   |
|-------------------------|----------------|------------------------------|--------|----------------|-------|
| ZEB1 (#57)              | NM_001174096   | F, AACTGCTGGGAGGATGACAC      | 20     | 59.67          | 55.00 |
|                         |                | R, TCCTGCTTCATCTGCCTGA       | 19     | 59.12          | 58.00 |
| NOTCH1 (#52)            | NM_017617      | F, CGGGGCTAACAAAGATATGC      | 20     | 56.65          | 50.00 |
|                         |                | R, CACCTTGGCGGTCTCGTA        | 18     | 59.03          | 61.11 |
| SLUG (#7)               | NM_003068.4    | F, TGGTTGCTTCAAGGACACAT      | 20     | 57.64          | 45.00 |
|                         |                | R, GCAAATGCTCTGTTGCAGTG      | 20     | 58.58          | 50.00 |
| ZEB2 (#65)              | NM_014795.3    | F, CGATCCAGACCGCAATTAAC      | 20     | 56.98          | 50.00 |
|                         |                | R, TGCTGACTGCATGACCATC       | 19     | 57.84          | 52.63 |
| TWIST1 (#6)             | NM_000474.3    | F, GGCATCACTATGGACTTTCTCTATT | 25     | 58.47          | 40.00 |
|                         |                | R, GGCCAGTTTGATCCCAGTATT     | 21     | 57.98          | 47.62 |
| 18SRNA (#48)            | M10098.1       | F, GCAATTATCCCATGAACG        | 20     | 55.09          | 45.00 |
|                         |                | R, GGGACTTAATCAACGCAAGC      | 20     | 57.46          | 50.00 |

**Abbreviations:** ZEB1&2, Homo sapiens zinc finger E-box binding homeobox 1 and 2; NOTCH1, Notch homolog 1, translocation-associated; SLUG, Zinc finger protein SNAI2; F, forward primer; R, reverse primer; T<sub>m</sub>, optimum primer melting temperatures; GC%, guanine and cytosine percentage.

\*Genbank accession number of cDNA and corresponding gene, available at <http://www.ncbi.nlm.nih.gov/>

Supplementary Table 3: List of specific antibodies for western blot

| Epitope                                   | Spices        | Company                | Catalog No. | Dilation | Source |
|-------------------------------------------|---------------|------------------------|-------------|----------|--------|
| <b>Primary antibodies</b>                 |               |                        |             |          |        |
| NOTCH1                                    | Human, Mouse  | eBioscience            | 14-5785-81  | 1:2000   | Mouse  |
| ZEB1                                      | Human, Rabbit | Santa Cruz             | SC-25388    | 1:1000   | Rabbit |
| ZEB2                                      | Human, Mouse  | Santa Cruz             | SC-271984   | 1:2000   | Mouse  |
| TWIST1                                    | Human, Mouse  | Abcam                  | ab175430    | 1:5000   | Mouse  |
| SLUG                                      | Human, Mouse  | Santa Cruz             | SC-166476   | 1:3000   | Mouse  |
| ACTIN                                     | Human, Mouse  | Bioworld<br>Technology | AA-128      | 1:5000   | Mouse  |
| TUBULIN                                   | Human, Mouse  | Bioworld<br>Technology | AT819       | 1:5000   | Mouse  |
| <b>Secondary antibodies or conjugates</b> |               |                        |             |          |        |
| anti-mouse HRP                            | Mouse         | Santa Cruz             | G3114       | 1:5000   | Goat   |
| anti-rabbit HRP                           | Rabbit        | Bioworld<br>Technology | A0208       | 1:3000   | Goat   |

**Abbreviations:** NOTCH1, Notch homolog 1, translocation-associated; ZEB1&2, TWIST1, Twist-related protein 1; SLUG, Zinc finger protein SNAI2; Homo sapiens zinc finger E-box binding homeobox 1 and 2; HRP, horseradish peroxidase.
